# Supplementary material for: Thermal transport properties of defective graphene/graphyne van der Waals heterostructures elucidated via molecular dynamics and machine learning
Source: Royal Society of Chemistry journal article supplement (doi:10.1039/d4nr02120g), 2024-01-01
Supplement: d4nr02120g1.pdf [file d4nr02120g1.pdf]

Supplementary information for

# Thermal Transport Properties of Defective Graphene/Graphyne van der Waals Heterostructures Elucidated via Molecular Dynamics and Machine Learning

Jian Li, Jin Zhang\*

School of Science, Harbin Institute of Technology, Shenzhen 518055, PR China

\*Corresponding author. E-mail address: [jinzhang@hit.edu.cn](mailto:jinzhang@hit.edu.cn) (J. Zhang).

Supplementary figures

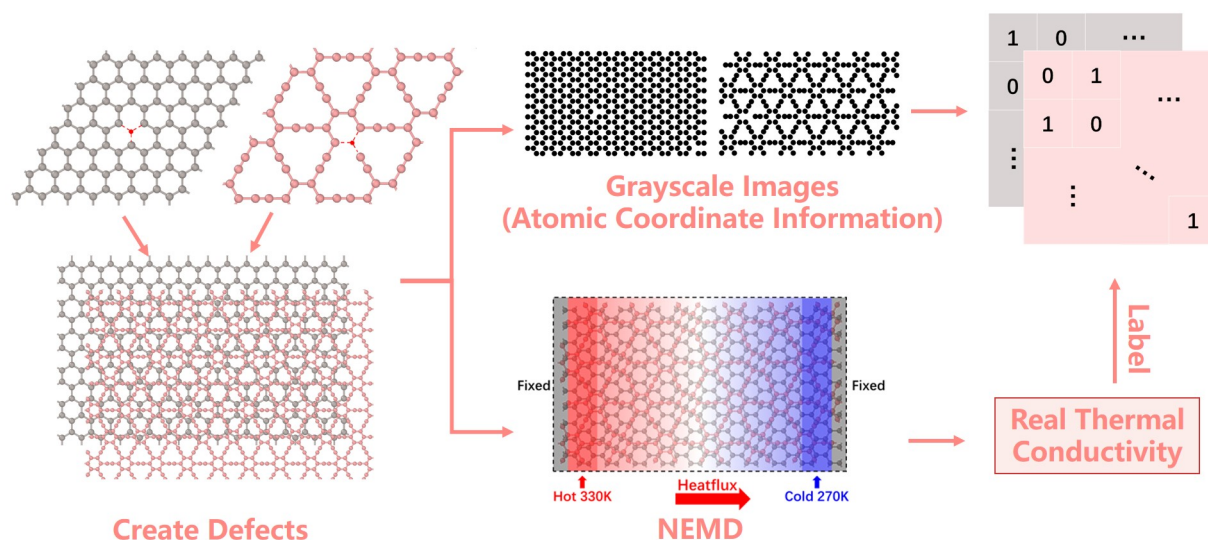

Fig. S1. The process of building the dataset.

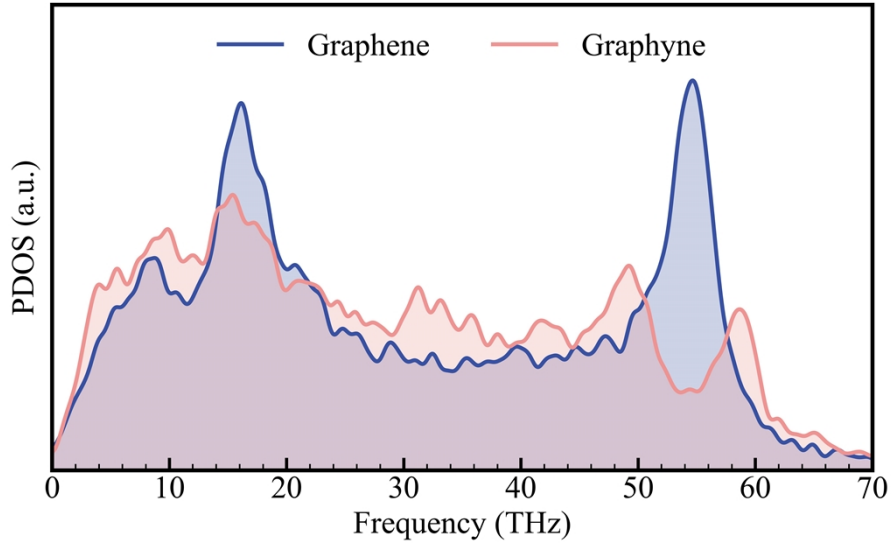

**Fig. S2.** The calculated phonon density of state (PDOS) of graphene and graphyne layers in pristine G/GY.

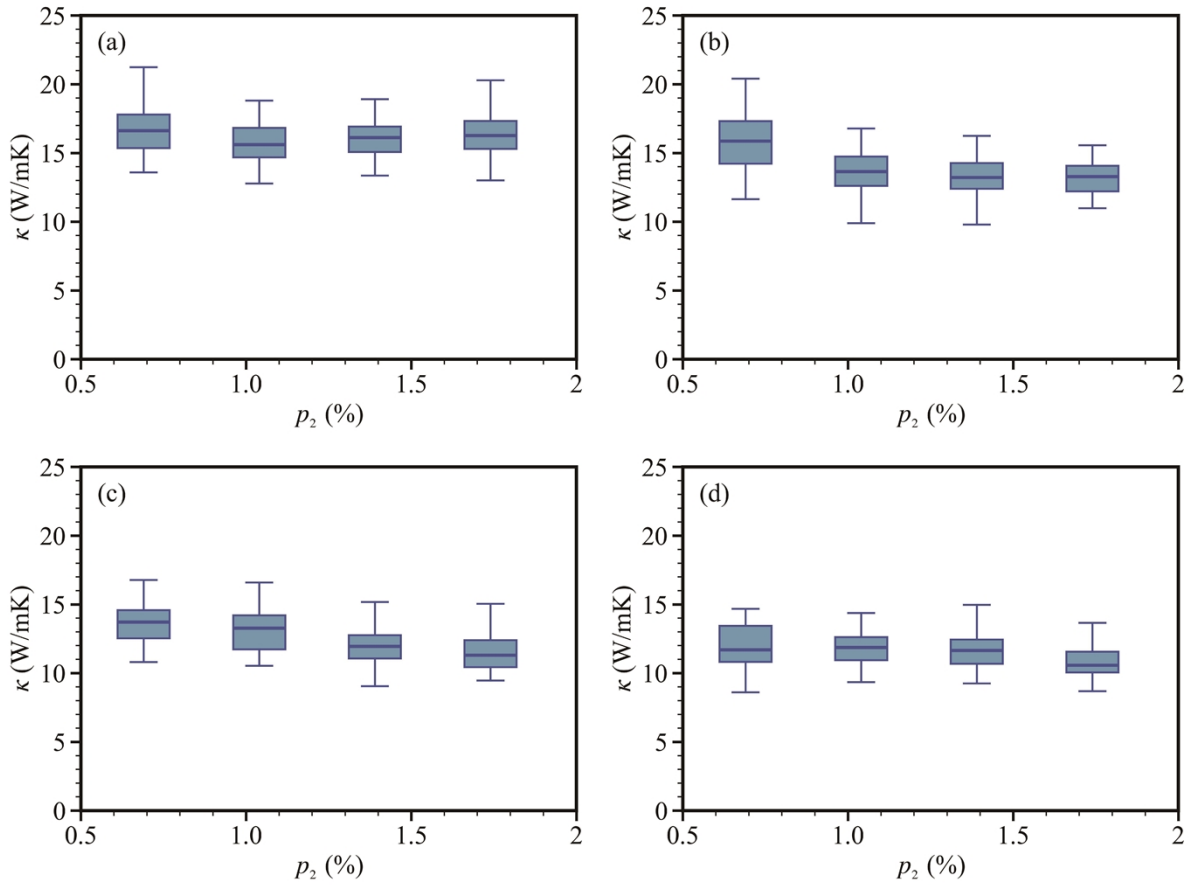

**Fig. S3.** Thermal conductivities of G/GY with various  $p_2$  when  $p_1$  is (a) 0.5%, (b) 1.0%, (c) 1.5% and (d) 2.0%.

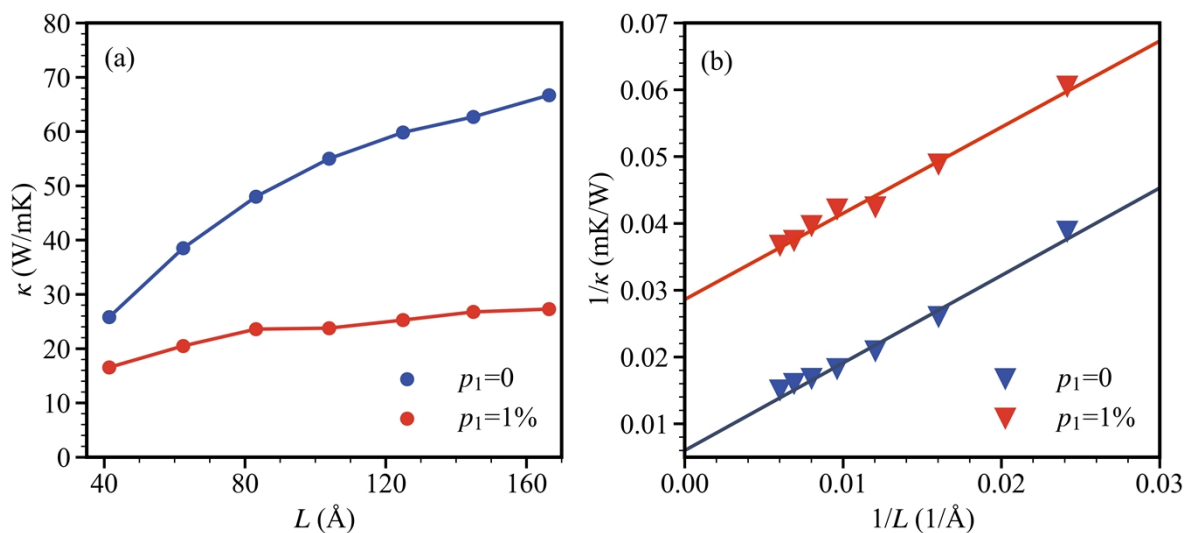

**Fig. S4.** (a) Thermal conductivities of pristine G/GY ( $p_1 = 0$ ) and defective G/GY ( $p_1 = 1\%$ ) with different lengths. (b) Relation between the inverse thermal conductivity and the inverse length of G/GY, which can be well fitted by the Matthiessen's rule (see the solid lines).

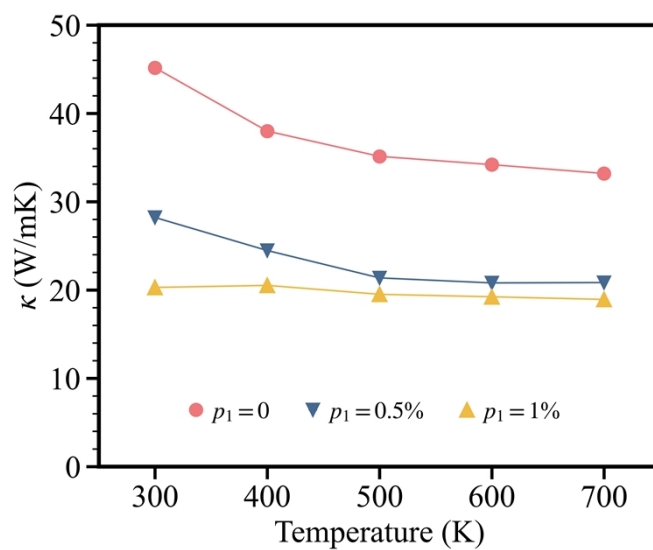

**Fig. S5.** Thermal conductivities of G/GY at different temperatures.

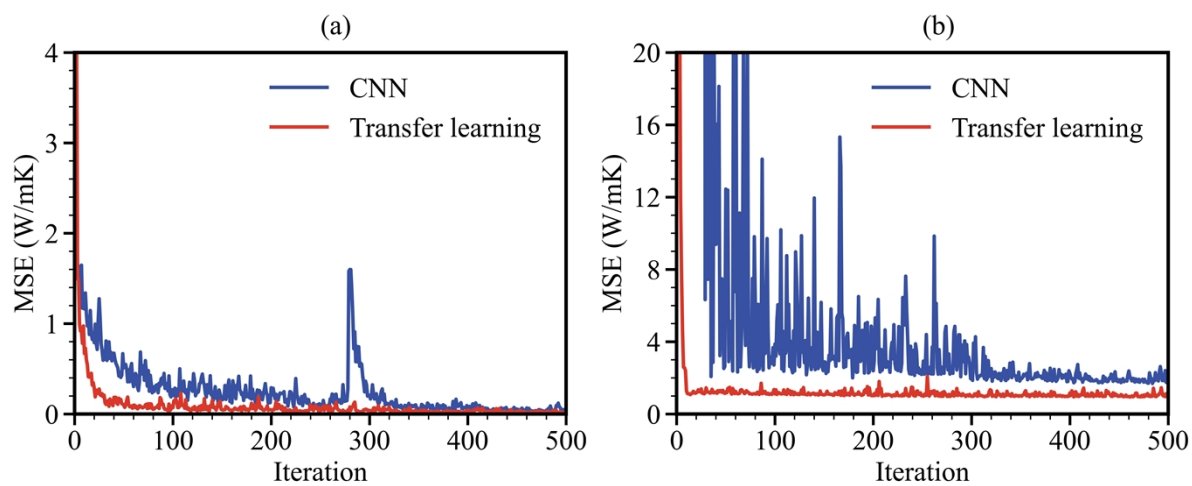

**Fig. S6.** Comparison of the MSE of CNN and transfer learning performed on (a) training set and (b) validation set.
